# Supplementary material for: Altered Topological Properties of Brain Networks in Social Anxiety Disorder: A Resting-state Functional MRI Study
Source: PubMed Central journal article supplement (PMC5339829; doi:10.1038/srep43089), 2017-03-07
Supplement: srep43089-s1.pdf [file srep43089-s1.pdf]

# **Altered Topological Properties of Brain Networks in Social Anxiety Disorder: A Resting-state Functional MRI Study**

Hongru Zhu, M.D., Ph.D., Changjian Qiu, M.D., Ph.D., Yajing Meng, M.D., Ph.D.,  
Minlan Yuan, M.D., Yan Zhang, M.D., Zhengjia Ren, M.D., Ph.D., Yuchen Li, M.D.,  
Xiaoqi Huang, M.D., Ph.D., Qiyong Gong, M.D., Ph.D., Su Lui, M.D., Ph.D., Wei  
Zhang, M.D.

## **Supplemental Text**

### **Network Analysis**

#### *Small-world analysis.*

The small-world parameters of a network (clustering coefficient  $C_p$ , and characteristic path length  $L_p$ ) were originally proposed by Watts and Strogatz<sup>1</sup>. Briefly, the  $C_p$  of a network was the average of the clustering coefficients over all nodes, where the clustering coefficient  $C_i$  of a node  $i$  was defined as the ratio of the number of existing connections among the node's neighbors and all their possible connections.  $C_p$  quantified the local interconnectivity of a network.  $L_p$  of a network was the shortest path length (number of edges) required to transfer from one node to another averaged over all pairs of nodes.  $L_p$  was an indicator of the overall routing efficiency of a network. In our study, we calculated the  $L_p$  as the "harmonic mean" distance between all possible pairs of regions to deal with the disconnected graphs dilemma<sup>2</sup>. To estimate the small-world properties, we scaled  $C_p$  and  $L_p$  derived from the brain networks

with the mean  $C_{p-s}$  and  $L_{p-s}$  of 100 random networks (i.e.,  $\gamma = C_p / C_{p-s}$  and  $\lambda = L_p / L_{p-s}$ ) that preserved the same number of nodes, edges and degree distributions as real brain networks. Typically, a small-world network should fulfill the conditions of  $\gamma > 1$  and  $\lambda \approx 1$ <sup>1</sup>, and therefore, the small-worldness scalar  $\sigma = \gamma / \lambda$  will be more than 1<sup>2</sup>. Of note, in the present study the “harmonic mean” distance was employed to calculate the characteristic path length to deal with the possible disconnected graphs dilemma<sup>3</sup>.

#### *Network efficiency.*

Efficiency is a more biologically relevant metric to describe brain networks from the perspective of parallel information flow that can deal with either the disconnected or nonsparse graphs or both<sup>4</sup>. Network efficiency measures how efficiently information is exchanged over the network. For a network  $G$  with  $N$  nodes and  $K$  edges, the global efficiency ( $E_{glob}$ ) of  $G$  can be computed as<sup>5,6</sup>:

$$E_{glob}(G) = \frac{1}{N(N-1)} \sum_{i \neq j \in G} \frac{1}{d_{ij}}, \quad (1)$$

where  $d_{ij}$  is the shortest path length between node  $i$  and node  $j$  in  $G$ .

Global efficiency measures the ability of parallel information transmission over the network. The local efficiency of  $(E_{loc})G$  is measured as<sup>5,6</sup>:

$$E_{loc}(G) = \frac{1}{N} \sum_{i \in G} E_{glob}(G_i), \quad (2)$$

where  $E_{glob}(G_i)$  is the global efficiency of  $G_i$ , the subgraph composed of the neighbors of node  $i$ . Local efficiency measures the fault tolerance of the

network, indicating the capability of information exchange for each subgraph when the index node is eliminated.

The nodal local efficiency <sup>4</sup> ( $\text{nodalE}_{loc}$ ) of node  $i$  is defined in the subgraph of the direct neighbors of  $i$ :

$$\text{nodalE}_{loc}(G, i) = \frac{1}{N_{Gi}(N_{Gi} - 1)} \sum_{j \neq k \in Gi} \frac{1}{d_{jk}}, \quad (3)$$

where  $N_{Gi}$  is the number of nodes in the subgraph  $Gi$  consisting of all of the neighbors of  $i$ ; and  $d_{jk}$  is the length of the shortest path, in terms of tractography-based measures of physical distances, between nodes  $j$  and  $k$ .

The nodal global efficiency <sup>4</sup> ( $\text{nodalE}_{glob}$ ) of node  $i$  is computed as:

$$\text{nodalE}_{glob}(G, i) = \frac{1}{(N - 1)} \sum_{j \in G, i \neq j} \frac{1}{d_{ij}}, \quad (4)$$

where  $N$  is the number of nodes in the network graph  $G$ ; and  $d_{ij}$  is the length of the shortest path, in terms of tractography-based measures of physical distances, between nodes  $i$  and  $j$ .

*Nodal centrality.* Degree  $k_i$  was used to measure the centrality of a node. It is defined as the number of links connected to the node, and it is a simple measurement of connectivity of a node with the rest of nodes in a network. Hub regions often interact with many other regions in the network and thus have high centrality. Formally, in a network  $G$  with  $N$  nodes and  $K$  edges, the degree  $k_i$  ( $\text{nodalDeg}$ ) of node  $i$  is defined as <sup>5</sup>:

$$k_i = \sum_{j \in G} a_{ij}, \quad (5)$$

where  $a_{ij}$  is the  $i$  th row and  $j$  th column element of the adjacency matrix.

Though these nodal centrality measurements are correlated each other, they reflect the importance of a node in a network from different aspects as defined above <sup>7</sup>.

## References

1. Watts DJ, Strogatz SH. Collective dynamics of 'small-world' networks. *Nature*. 1998. 393(6684): 440-2.
2. Humphries, M. D., Gurney, K. & Prescott, T. J. The brainstem reticular formation is a small-world, not scale-free, network. *Proc. Biol. Sci.* **273**, 503-511 (2006).
3. Newman, M. E. Mixing patterns in networks. *Phys Rev E Stat Nonlin Soft Matter Phys* **67**, 026126 (2003).
4. Latora, V. & Marchiori, M. Efficient behavior of small-world networks. *Phys. Rev. Lett.* **87**, 198701 (2001).
5. Liu, Y. *et al.* Disrupted small-world networks in schizophrenia. *Brain* **131**, 945-961 (2008).
6. Achard, S. & Bullmore, E. Efficiency and cost of economical brain functional networks. *PLoS Comput. Biol.* **3**, e17 (2007).
7. Bullmore, E. & Sporns, O. The economy of brain network organization. *Nat. Rev. Neurosci.* **13**, 336-349 (2012).

### Supplement Tables

**Table S1. Regions of interest (ROIs) included in AAL-atlas**

| Index   | Regions                                 | Abbr.     | Index   | Regions                                               | Abbr. |
|---------|-----------------------------------------|-----------|---------|-------------------------------------------------------|-------|
| (1,2)   | Precentral gyrus                        | PreCG     | (47,48) | Lingual gyrus                                         | LING  |
| (3,4)   | Superior frontal gyrus, dorsolateral    | SFGdor    | (49,50) | Superior occipital gyrus                              | SOG   |
| (5,6)   | Superior frontal gyrus, orbital part    | ORBsup    | (51,52) | Middle occipital gyrus                                | MOG   |
| (7,8)   | Middle frontal gyrus                    | MFG       | (53,54) | Inferior occipital gyrus                              | IOG   |
| (9, 10) | Middle frontal gyrus, orbital part      | ORBmid    | (55,56) | Fusiform gyrus                                        | FFG   |
| (11,12) | Inferior frontal gyrus, opercular part  | IFGoperc  | (57,58) | Postcentral gyrus                                     | PoCG  |
| (13,14) | Inferior frontal gyrus, triangular part | IFGtriang | (59,60) | Superior parietal gyrus                               | SPG   |
| (15,16) | Inferior frontal gyrus, orbital part    | ORBinf    | (61,62) | Inferior parietal, but supramarginal and angular gyri | IPL   |
| (17,18) | Rolandic operculum                      | ROL       | (63,64) | Supramarginal gyrus                                   | SMG   |

|         |                                           |           |         |                                        |        |
|---------|-------------------------------------------|-----------|---------|----------------------------------------|--------|
| (19,20) | Supplementary motor area                  | SMA       | (65,66) | Angular gyrus                          | ANG    |
| (21,22) | Olfactory cortex                          | OLF       | (67,68) | Precuneus                              | PCUN   |
| (23,24) | Superior frontal gyrus, medial            | SFGmed    | (69,70) | Paracentral lobule                     | PCL    |
| (25,26) | Superior frontal gyrus, medial orbital    | ORBsupmed | (71,72) | Caudate nucleus                        | CAU    |
| (27,28) | Gyrus rectus                              | REC       | (73,74) | Lenticular nucleus, putamen            | PUT    |
| (29,30) | Insula                                    | INS       | (75,76) | Lenticular nucleus, pallidum           | PAL    |
| (31,32) | Anterior cingulate and paracingulate gyri | ACG       | (77,78) | Thalamus                               | THA    |
| (33,34) | Median cingulate and paracingulate gyri   | DCG       | (79,80) | Heschl gyrus                           | HES    |
| (35,36) | Posterior cingulate gyrus                 | PCG       | (81,82) | Superior temporal gyrus                | STG    |
| (37,38) | Hippocampus                               | HIP       | (83,84) | Temporal pole: superior temporal gyrus | TPOsup |
| (39,40) | Parahippocampal gyrus                     | PHG       | (85,86) | Middle temporal gyrus                  | MTG    |
| (41,42) | Amygdala                                  | AMYG      | (87,88) | Temporal pole: middle temporal gyrus   | TPOmid |
| (43,44) | Calcarine fissure and surrounding cortex  | CAL       | (89,90) | Inferior temporal gyrus                | ITG    |
| (45,46) | Cuneus                                    | CUN       |         |                                        |        |

The regions are listed in terms of a prior AAL atlas <sup>6</sup>. Odd and even numbers represent brain regions of left and right hemispheres, respectively.

**Table S2. Decreased positive functional connectivity in SAD compared with healthy controls**

| Region 1                                   | Classification | Region 2                                      | Classification       | t    | weight |
|--------------------------------------------|----------------|-----------------------------------------------|----------------------|------|--------|
| Left superior frontal gyrus, dorsolateral  | Frontal        | Right posterior cingulate gyrus               | Parietal–(pre) motor | 3.61 | 0.434  |
| Right superior frontal gyrus, orbital part | Frontal        | Left calcarine fissure and surrounding cortex | Occipital            | 3.80 | 0.097  |
| Right superior frontal gyrus, orbital part | Frontal        | Right inferior occipital gyrus                | Occipital            | 3.93 | 0.650  |
| Right superior frontal gyrus, orbital part | Frontal        | Right fusiform gyrus                          | Occipital            | 4.42 | 0.645  |

|                                                |         |                                 |                      |      |       |
|------------------------------------------------|---------|---------------------------------|----------------------|------|-------|
| Right middle frontal gyrus, orbital part       | Frontal | Right cuneus                    | Occipital            | 3.66 | 0.150 |
| Right middle frontal gyrus, orbital part       | Frontal | Right superior occipital gyrus  | Parietal–(pre) motor | 4.07 | 0.322 |
| Right middle frontal gyrus, orbital part       | Frontal | Right fusiform gyrus            | Occipital            | 3.95 | 0.204 |
| Left superior frontal gyrus, medial            | Frontal | Left posterior cingulate gyrus  | Parietal–(pre) motor | 4.16 | 0.060 |
| Left superior frontal gyrus, medial            | Frontal | Right posterior cingulate gyrus | Parietal–(pre) motor | 4.17 | 0.313 |
| Right superior frontal gyrus, medial           | Frontal | Left posterior cingulate gyrus  | Parietal–(pre) motor | 5.11 | 0.260 |
| Right superior frontal gyrus, medial           | Frontal | Right posterior cingulate gyrus | Parietal–(pre) motor | 4.08 | 0.041 |
| Right superior frontal gyrus, medial           | Frontal | Left precuneus                  | Parietal–(pre) motor | 4.29 | 0.080 |
| Right superior frontal gyrus, medial           | Frontal | Right precuneus                 | Parietal–(pre) motor | 4.89 | 0.558 |
| Right superior frontal gyrus, medial           | Frontal | Left middle temporal gyrus      | Temporal             | 4.83 | 0.299 |
| Right superior frontal gyrus, medial           | Frontal | Right inferior temporal gyrus   | Temporal             | 3.65 | 0.149 |
| Left superior frontal gyrus, medial orbital    | Frontal | Left posterior cingulate gyrus  | Parietal–(pre) motor | 3.60 | 0.378 |
| Right superior frontal gyrus, medial orbital   | Frontal | Left posterior cingulate gyrus  | Parietal–(pre) motor | 3.68 | 0.218 |
| Right superior frontal gyrus, medial orbital   | Frontal | Right precuneus                 | Parietal–(pre) motor | 3.59 | 0.048 |
| Right superior frontal gyrus, medial orbital   | Frontal | Right inferior temporal gyrus   | Temporal             | 3.70 | 0.180 |
| Left gyrus rectus                              | Frontal | Right precuneus                 | Parietal–(pre) motor | 3.97 | 0.280 |
| Right gyrus rectus                             | Frontal | Left posterior cingulate gyrus  | Parietal–(pre) motor | 3.84 | 0.113 |
| Right gyrus rectus                             | Frontal | Left precuneus                  | Parietal–(pre) motor | 3.89 | 0.086 |
| Right gyrus rectus                             | Frontal | Right precuneus                 | Parietal–(pre) motor | 4.24 | 0.443 |
| Right gyrus rectus                             | Frontal | Right middle temporal gyrus     | Temporal             | 3.86 | 0.218 |
| Right gyrus rectus                             | Frontal | Right inferior temporal gyrus   | Temporal             | 3.66 | 0.151 |
| Left anterior cingulate and paracingulate gyri | Frontal | Right inferior temporal gyrus   | Temporal             | 3.84 | 0.045 |

|                                                 |                      |                                            |                      |      |       |
|-------------------------------------------------|----------------------|--------------------------------------------|----------------------|------|-------|
| Right anterior cingulate and paracingulate gyri | Frontal              | Right inferior temporal gyrus              | Temporal             | 4.06 | 0.267 |
| Left posterior cingulate gyrus                  | Parietal–(pre) motor | Right angular gyrus                        | Parietal–(pre) motor | 3.72 | 0.275 |
| Left posterior cingulate gyrus                  | Parietal–(pre) motor | Right temporal pole: middle temporal gyrus | Medial temporal      | 3.84 | 0.032 |
| Right posterior cingulate gyrus                 | Parietal–(pre) motor | Right temporal pole: middle temporal gyrus | Medial temporal      | 3.72 | 0.183 |
| Right hippocampus                               | Medial temporal      | Right temporal pole: middle temporal gyrus | Medial temporal      | 3.67 | 0.529 |
| Right parahippocampal gyrus                     | Medial temporal      | Right temporal pole: middle temporal gyrus | Medial temporal      | 3.60 | 0.241 |
| Left calcarine fissure and surrounding cortex   | Occipital            | Right temporal pole: middle temporal gyrus | Medial temporal      | 3.88 | 0.033 |
| Left calcarine fissure and surrounding cortex   | Occipital            | Right inferior temporal gyrus              | Temporal             | 3.70 | 0.087 |
| Right calcarine fissure and surrounding cortex  | Occipital            | Right temporal pole: middle temporal gyrus | Medial temporal      | 4.24 | 0.416 |
| Right calcarine fissure and surrounding cortex  | Occipital            | Right inferior temporal gyrus              | Temporal             | 3.73 | 0.318 |
| Right cuneus                                    | Occipital            | Right temporal pole: middle temporal gyrus | Medial temporal      | 4.41 | 0.196 |
| Right lingual gyrus                             | Occipital            | Right inferior temporal gyrus              | Temporal             | 3.58 | 0.216 |
| Right middle occipital gyrus                    | Occipital            | Right temporal pole: middle temporal gyrus | Medial temporal      | 3.79 | 0.159 |
| Right inferior occipital gyrus                  | Occipital            | Right inferior temporal gyrus              | Temporal             | 3.71 | 0.103 |
| Left fusiform gyrus                             | Occipital            | Right temporal pole: middle temporal gyrus | Medial temporal      | 3.94 | 0.141 |
| Left fusiform gyrus                             | Occipital            | Right inferior temporal gyrus              | Temporal             | 3.62 | 0.206 |
| Right fusiform gyrus                            | Occipital            | Right temporal pole: middle                | Medial temporal      | 4.35 | 0.199 |

|                                            |                      |                                            |                 |      |       |
|--------------------------------------------|----------------------|--------------------------------------------|-----------------|------|-------|
|                                            |                      | temporal gyrus                             |                 |      |       |
| Right fusiform gyrus                       | Occipital            | Right inferior temporal gyrus              | Temporal        | 4.12 | 0.123 |
| Left precuneus                             | Parietal–(pre) motor | Right temporal pole: middle temporal gyrus | Medial temporal | 4.18 | 0.488 |
| Right precuneus                            | Parietal–(pre) motor | Right temporal pole: middle temporal gyrus | Medial temporal | 4.19 | 0.394 |
| Right precuneus                            | Parietal–(pre) motor | Left inferior temporal gyrus               | Temporal        | 3.81 | 0.320 |
| Right temporal pole: middle temporal gyrus | Medial temporal      | Left inferior temporal gyrus               | Temporal        | 3.60 | 0.193 |
| Right temporal pole: middle temporal gyrus | Medial temporal      | Right inferior temporal gyrus              | Temporal        | 4.08 | 0.051 |
